Inferred effects of reproduction on immunosuppression and oxidative damage  
are critically dependent on the exact markers used

Deng-Bao Yang Yan-Chao Xu De-Hua Wang John R. Speakman

Fig.S1.

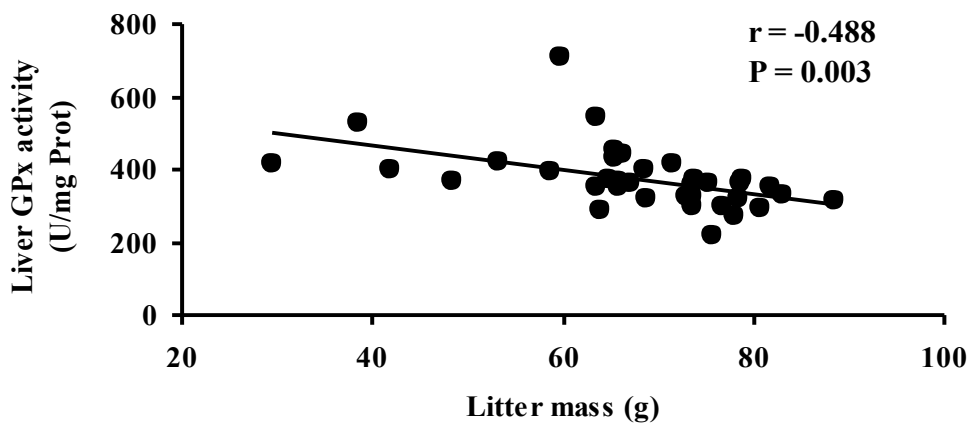

Fig.S2.

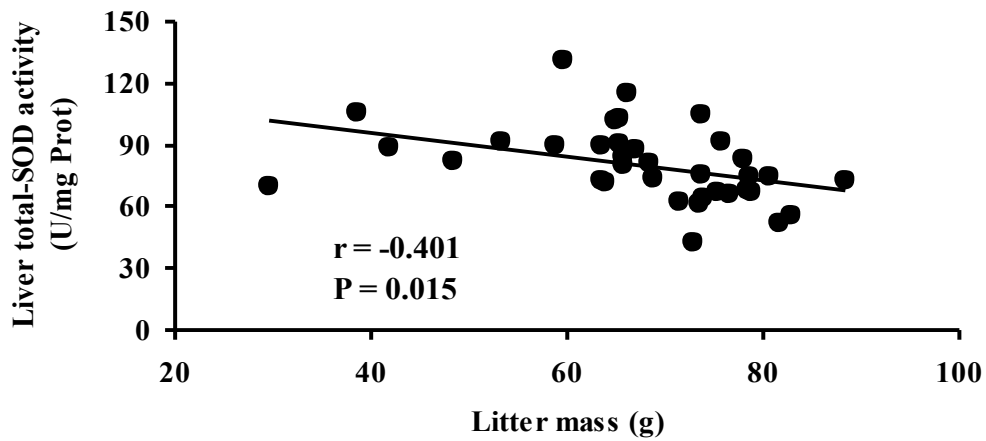

Fig.S3

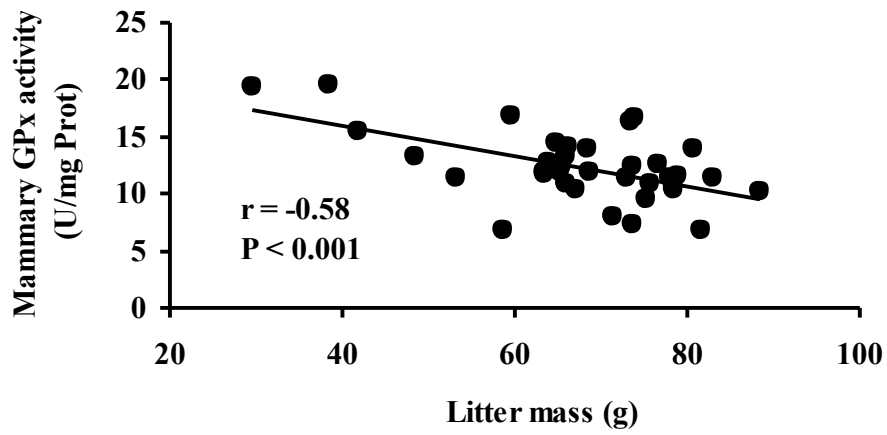

Fig.S4

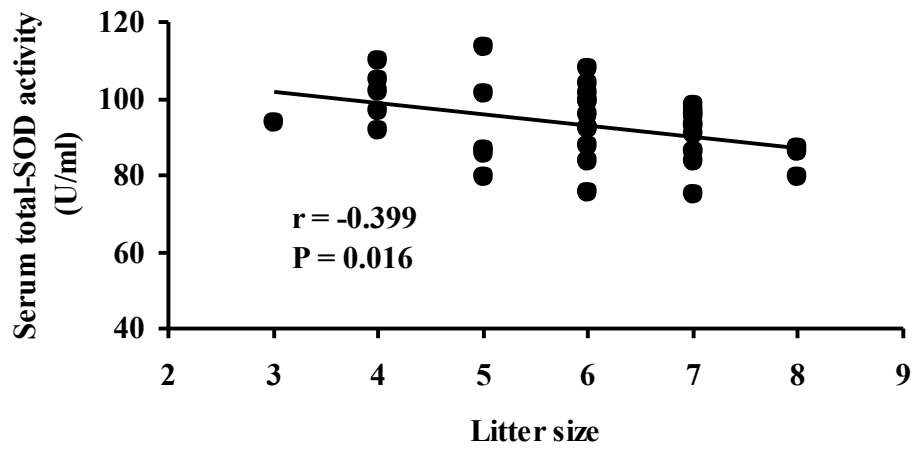

Fig. S5

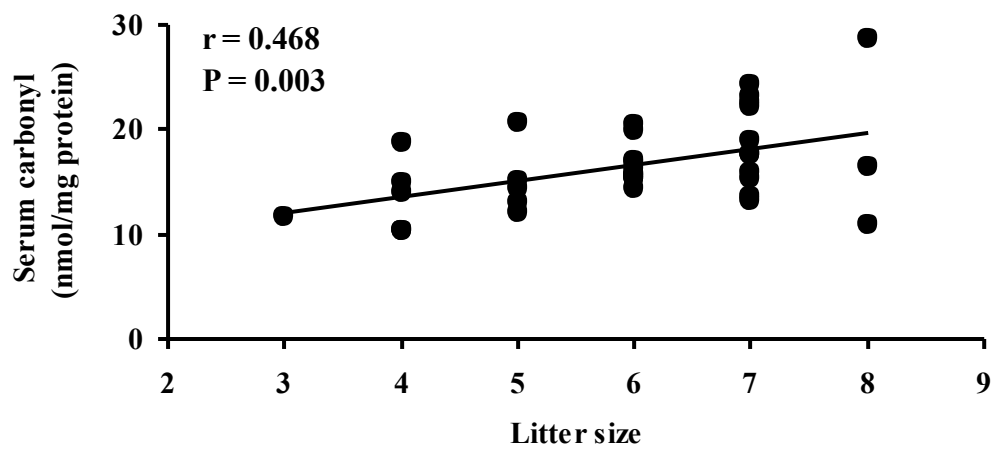

**Fig.S6**

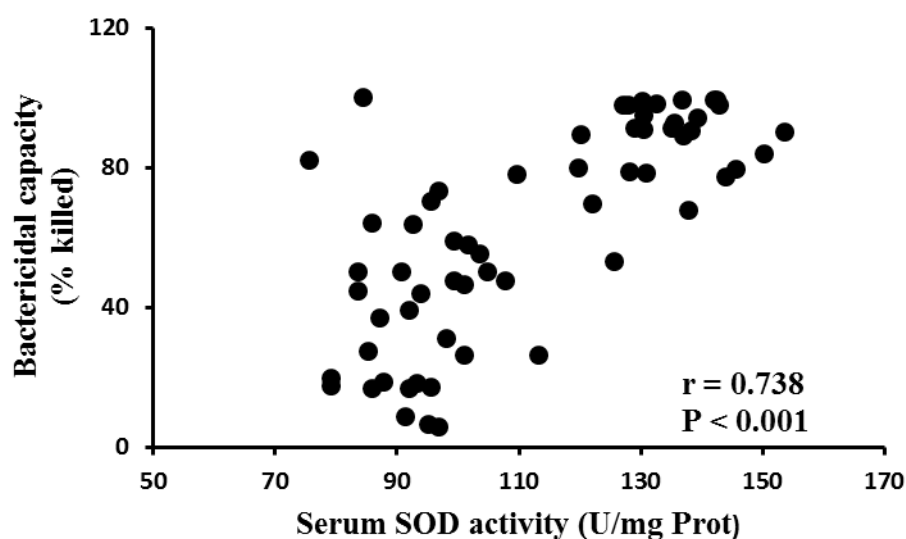

**Fig.S7**

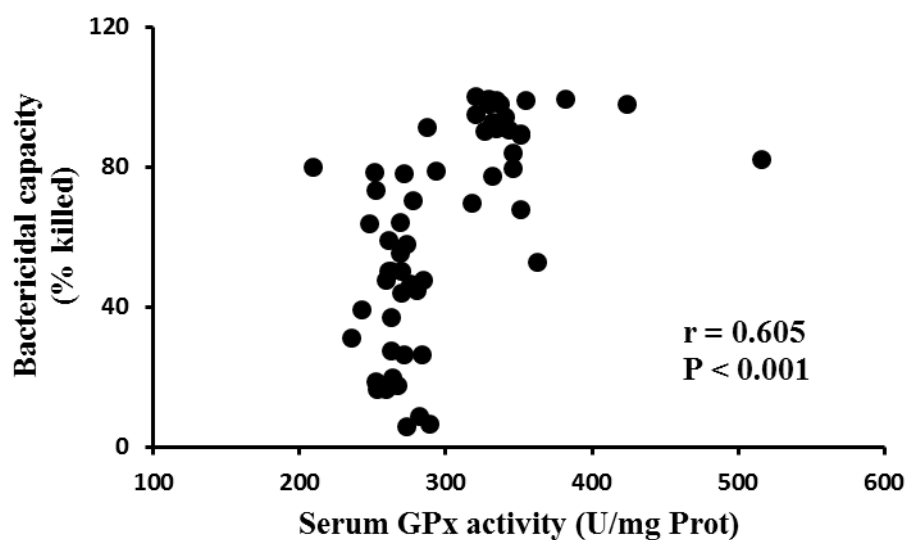

Figure S1-S7 Litter mass was negatively correlated with liver GPx activity ( $r = -0.488, p = 0.003$ ), liver total-SOD activity ( $r = -0.401, p = 0.015$ ) and GPx activity in mammary gland ( $r = -0.580, p < 0.001$ ), and the same significant correlations existed between litter size and serum total-SOD activity ( $r = -0.399, p = 0.016$ ; figure S1, S2, S3 and S4). Serum protein carbonyl concentrations were positively correlated with litter size ( $r = 0.468, p = 0.003$ ; figure S5). There were significantly positive correlations between these two antioxidants (serum SOD activity and GPx activity) and bactericidal capacity ( $r = 0.738, p < 0.001$ ;  $r = 0.605, p < 0.001$ ; figures S6 and S7).
